# Supplementary material for: Characterization of Xanthomonas arboricola pv. juglandis Bacteriophages against Bacterial Walnut Blight and Field Evaluation
Source: MDPI journal article supplement (doi:10.3390/v14071380), 2022-06-24
Supplement: s1 [file s1]

## Supplementary Materials

**Table S1.** Biochemical and antibiotic resistance profile of *Xanthomonas arboricola* pv. *juglandis* strain J303 employed in this study.

| Reaction/Enzyme                           | Xaj J303 WT |
|-------------------------------------------|-------------|
| Reduction of nitrates to nitrites         | -           |
| Reduction to nitrates to nitrogen         | +           |
| Indole production                         | -           |
| Glucose fermentation                      | -           |
| Arginine Dihydrolase                      | +           |
| Urease                                    | +           |
| Esculin hydrolysis                        | +           |
| Gelatin hydrolysis                        | +           |
| B-galactosidase                           | +           |
| <b>Carbohydrate assimilation</b>          |             |
| Glucose                                   | +           |
| Arabinose                                 | -           |
| Mannose                                   | +           |
| Mannitol                                  | -           |
| N-Acetyl-Glucosamine                      | +           |
| Maltose                                   | -           |
| Potassium Gluconate                       | -           |
| Capric Acid                               | -           |
| Adipic Acid                               | -           |
| Malate                                    | +           |
| Trisodium Citrate                         | +           |
| Phenylacetic Acid                         | -           |
| <b>Antibiotic resistance profile (mm)</b> |             |
| Gentamicin                                | 22 ± 0,2    |
| Streptomycin                              | 32 ± 0,7    |
| Oxytetracycline                           | 37 ± 0,5    |

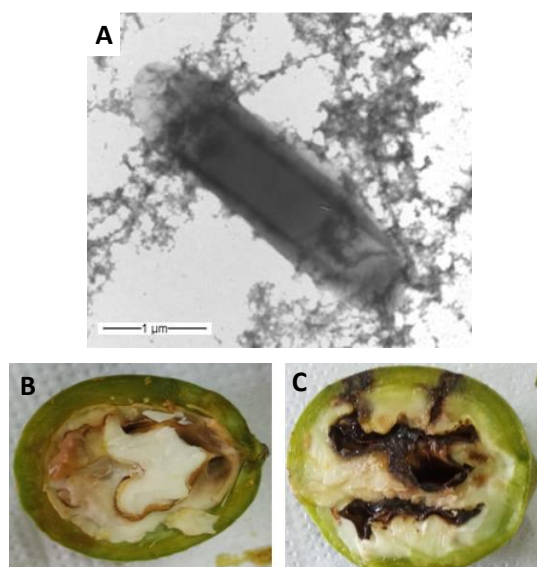

**Figure S1.** Characterization of *Xanthomonas arboricola* pv. *juglandis* J303 employed for isolation and propagation of bacteriophages. (A) Transmission electron microscopy of *X. juglandis* strain J303 (bar 1  $\mu$ m). Necrotic damage in immature walnut fruit: Control PBS (B) and *X. juglandis* J303 (C).

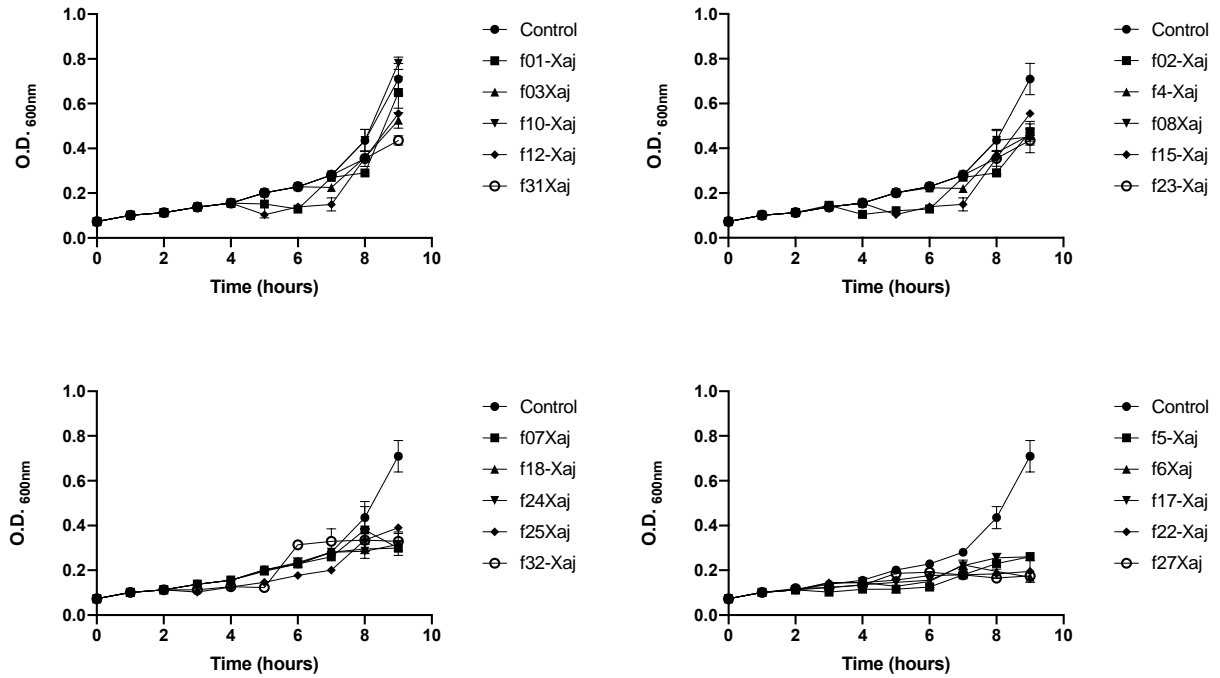

**Figure S2.** In vitro activity assay of bacteriophages against *Xanthomonas arboricola* pv. *juglandis* J303. The phages were grouped in each graph according to the OD600nm ranges they reached at the end of the assay. All experiments were employed in three independent replicates.

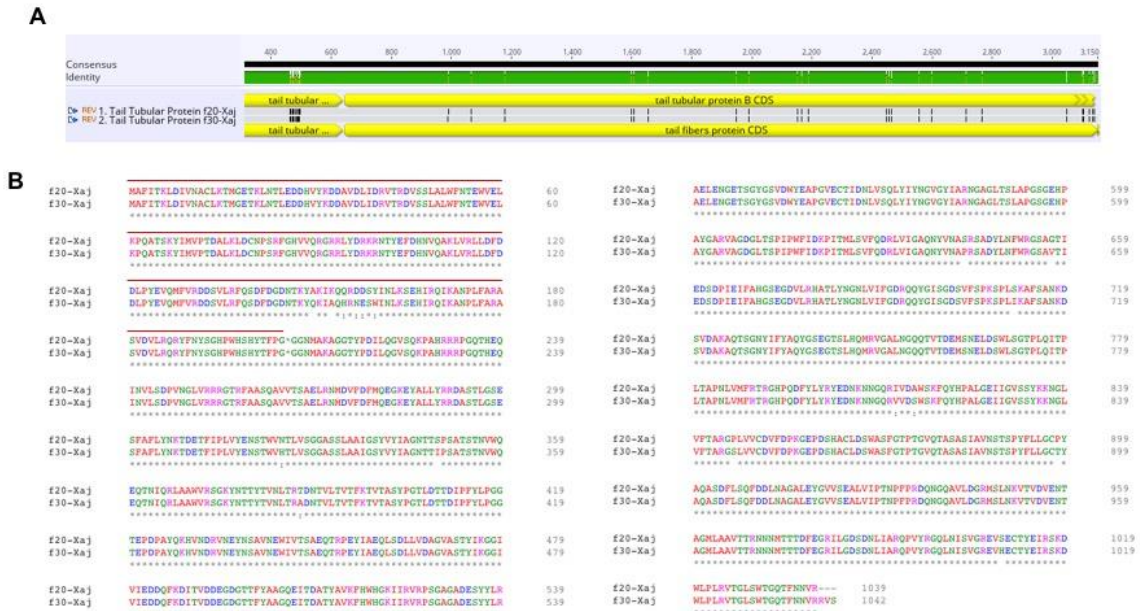

**Figure S3.** Alignment analysis of tail tubular protein of f20-Xaj and f30-Xaj bacteriophages. (A) Schematic depicting nucleotide changes between sequences performed with Geneious Prime® 2022.0.2 software. (B) Alignment of putative bacteriophage tail tubular proteins A and B performed with online Clustal-Omega server. Only the amino acid sequence of tubular protein A is indicated with the upper red line.
